# Supplementary material for: Multi-site calibration and validation of SWAT with satellite-based evapotranspiration in a data sparse catchment in southwestern Nigeria
Source: Copernicus journal article supplement (doi:10.5194/hess-2018-170), 2018-04-23
Supplement: Supplementary file 1 [file hess-2018-170-supplement.pdf]

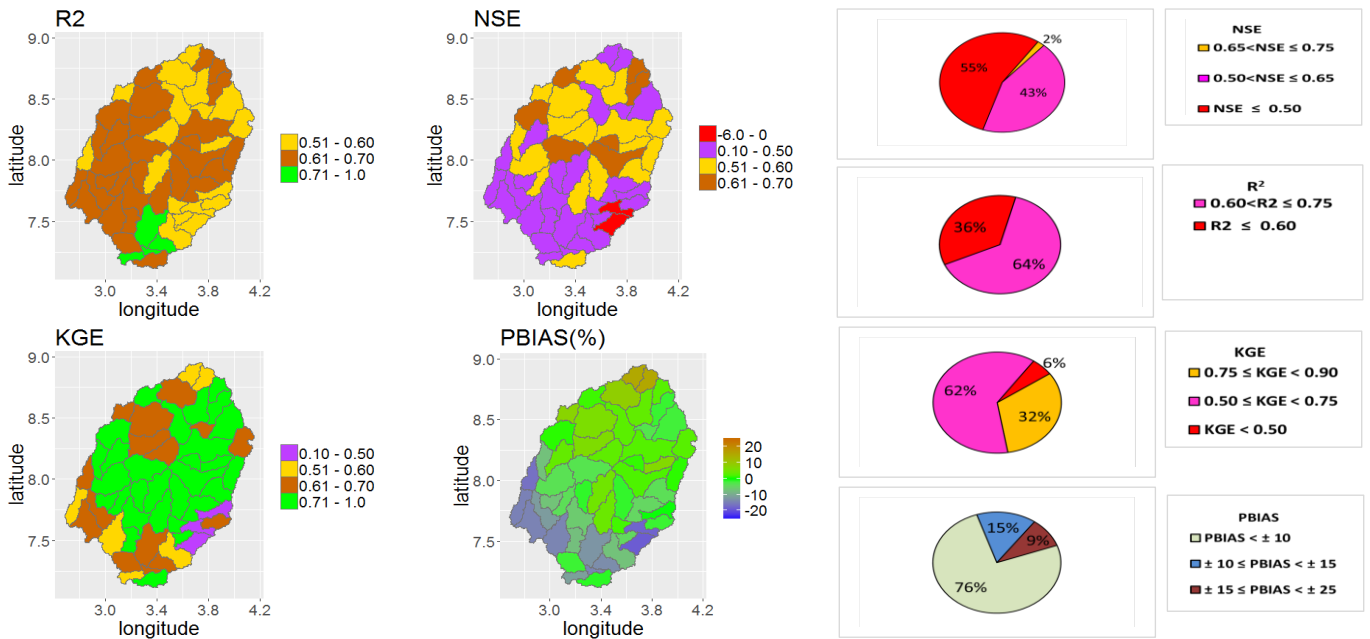

**Figure S1: Performance metrics (NSE, KGE, R<sup>2</sup>, and PBIAS) of SWAT (SWAT\_P-T) when calibrated with GLEAM\_v3.0a (GS2).**

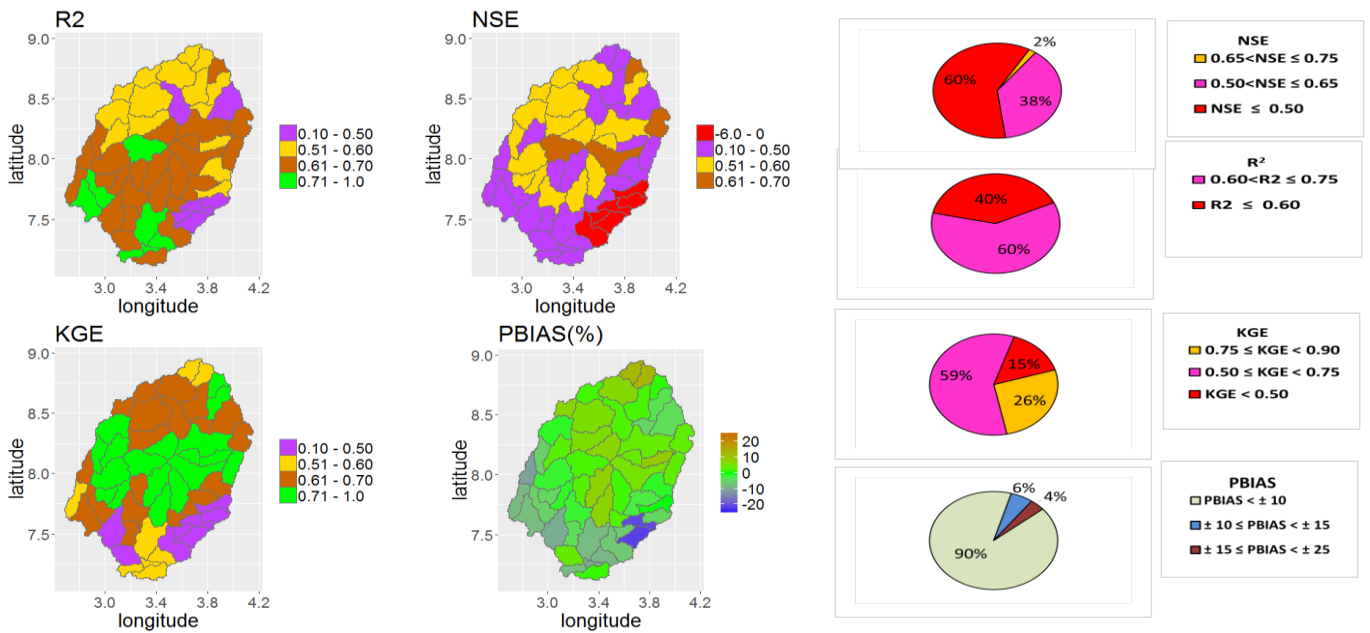

**Figure S2: Performance metrics (NSE, KGE, R<sup>2</sup>, and PBIAS) of SWAT (SWAT\_P-T) when validated with GLEAM\_v3.0a (GS2).**

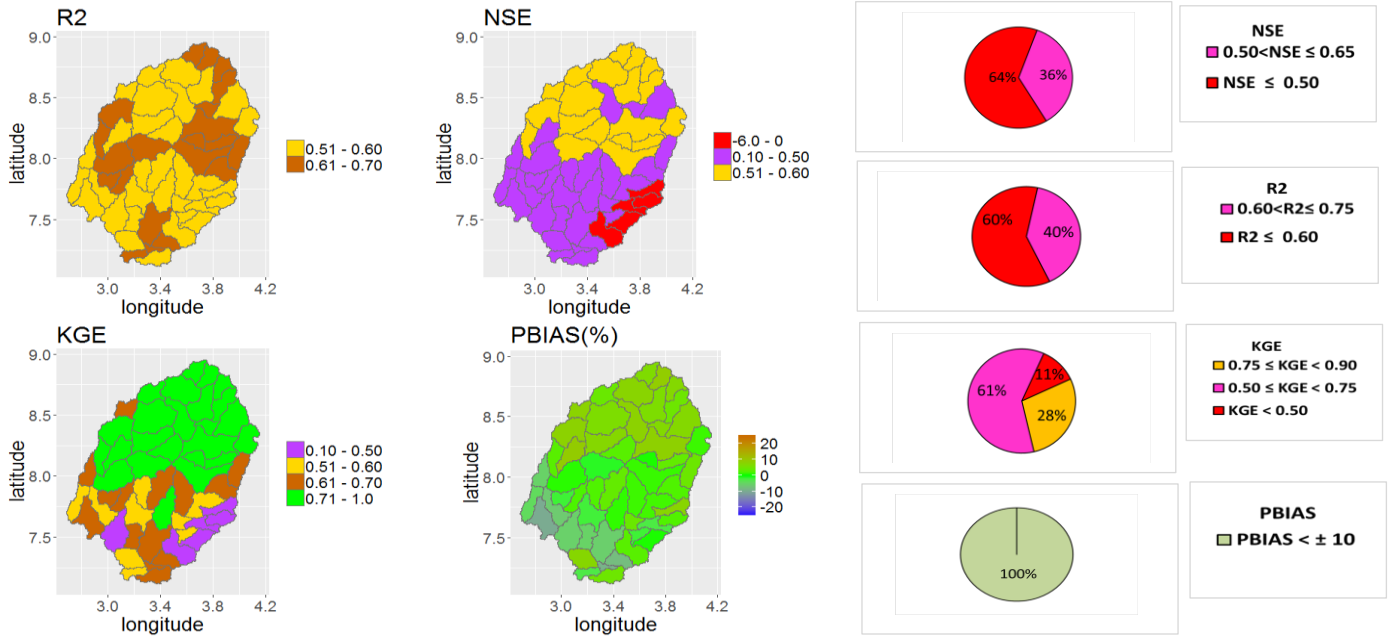

5 Figure S3: Performance metrics (NSE, KGE,  $R^2$ , and PBIAS) of SWAT (SWAT\_P-M) when calibrated with GLEAM\_v3.0a (GS3).

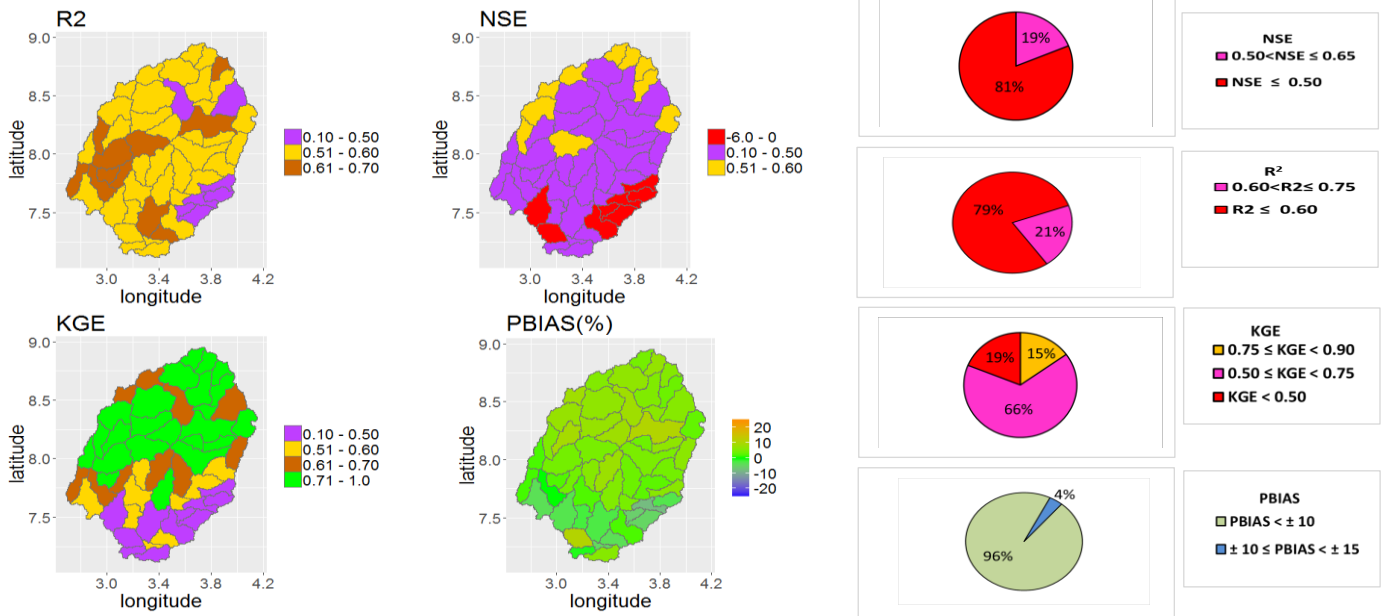

Figure S4: Performance metrics (NSE, KGE,  $R^2$ , and PBIAS) of SWAT (SWAT\_P-M) when validated with GLEAM\_v3.0a (GS3).

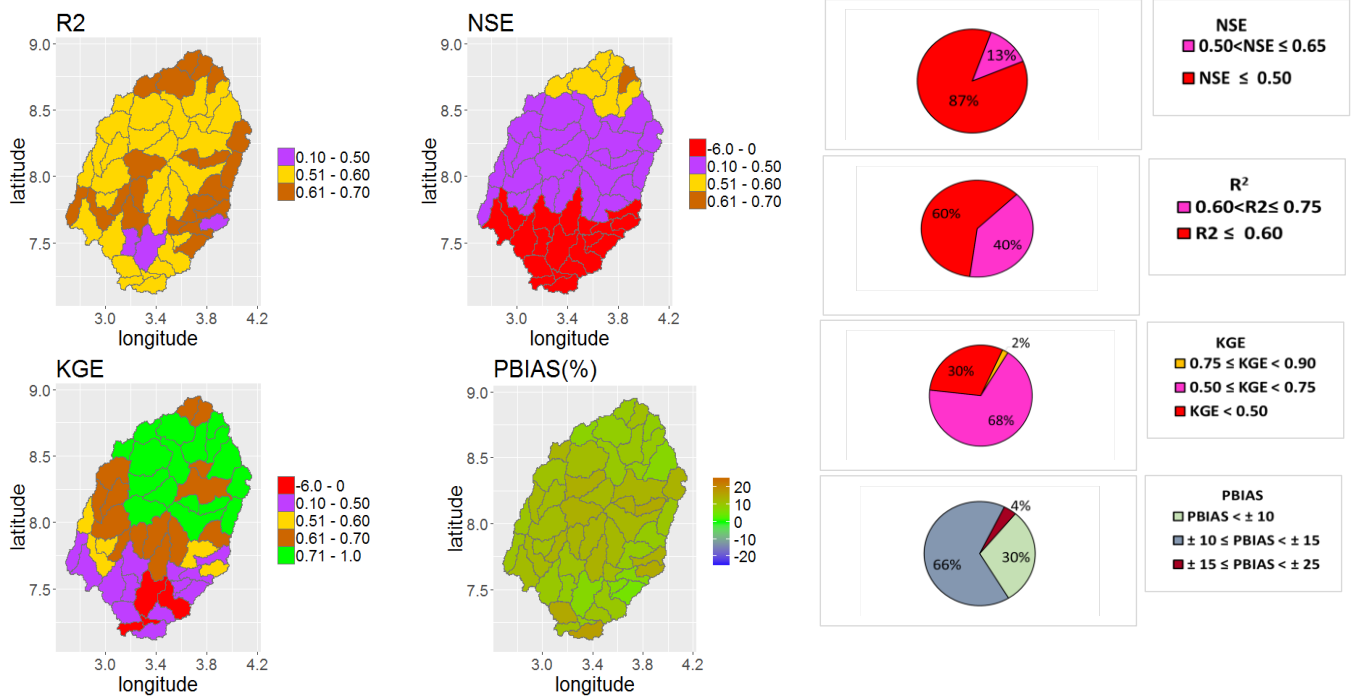

Figure S5: Performance metrics (NSE, KGE, R<sup>2</sup>, and PBIAS) of SWAT (SWAT\_HG) when calibrated with MOD16 (MS4).

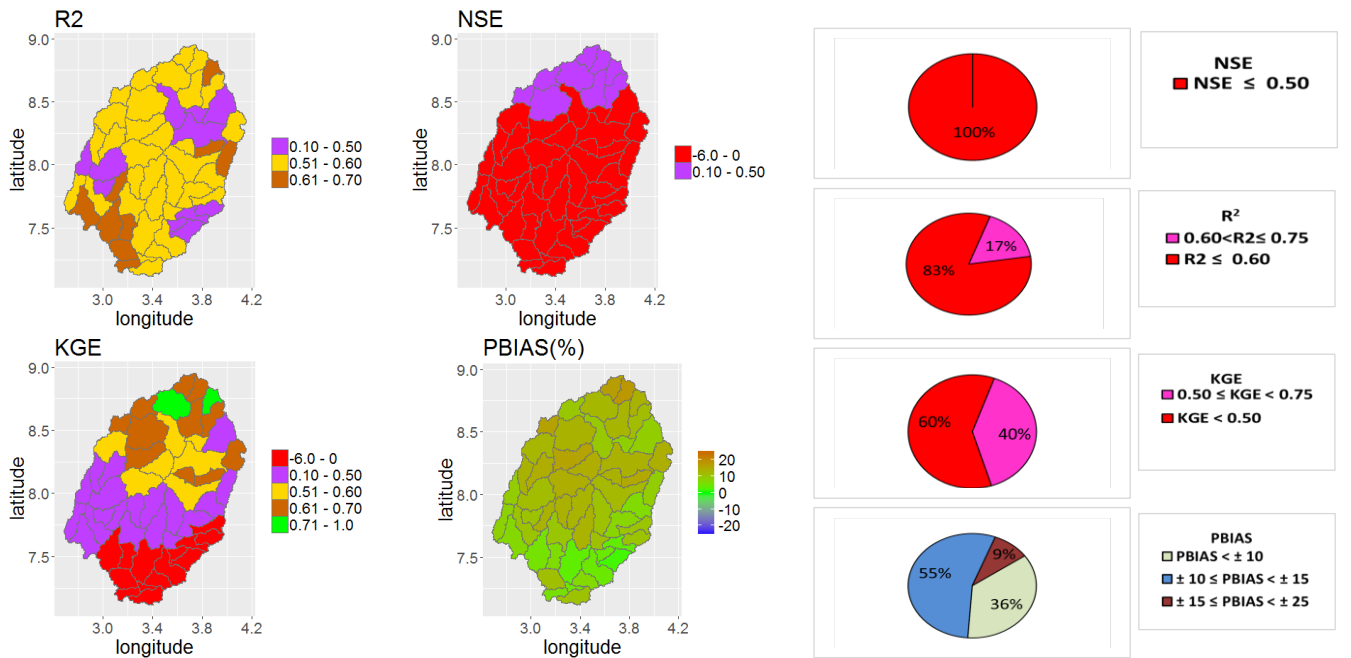

5 Figure S6: Performance metrics (NSE, KGE, R<sup>2</sup>, and PBIAS) of SWAT (SWAT\_HG) when validated with MOD16 (MS4).

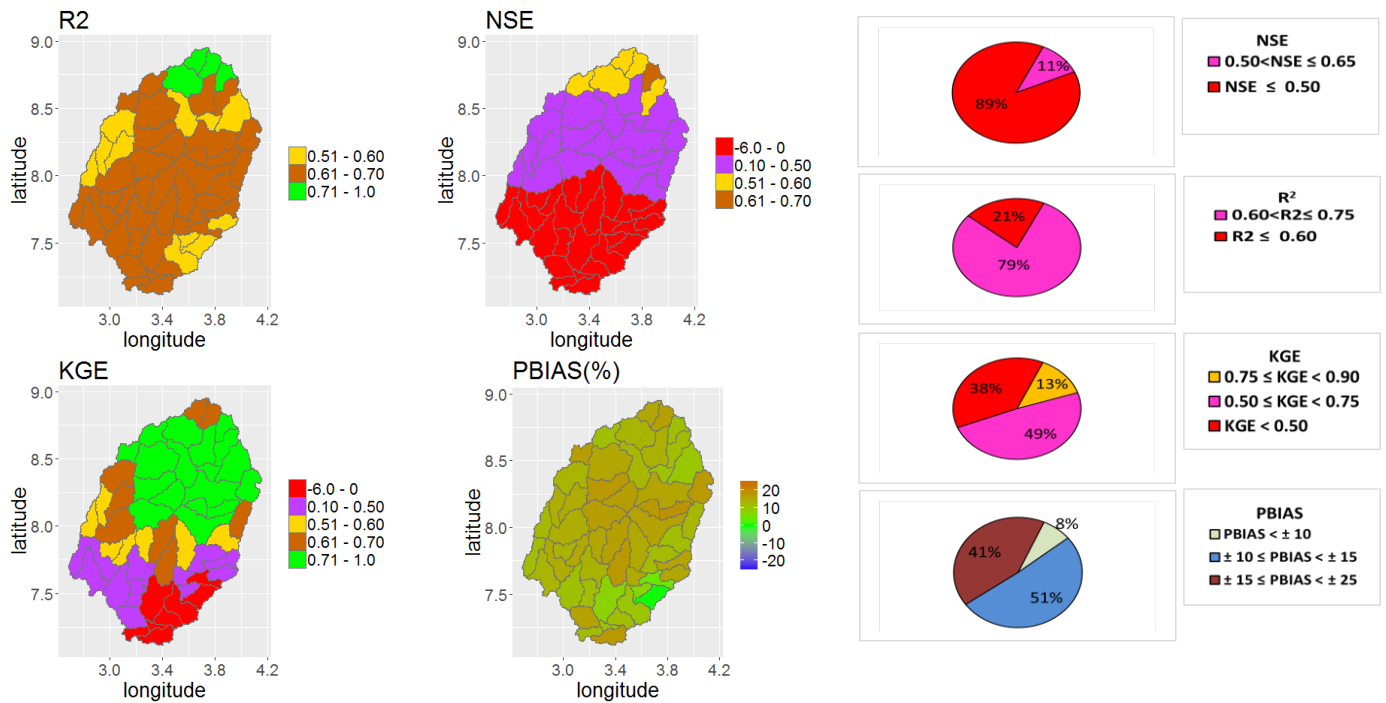

Figure S7: Performance metrics (NSE, KGE,  $R^2$ , and PBIAS) of SWAT (SWAT\_P-T) when calibrated with MOD16 (MS5).

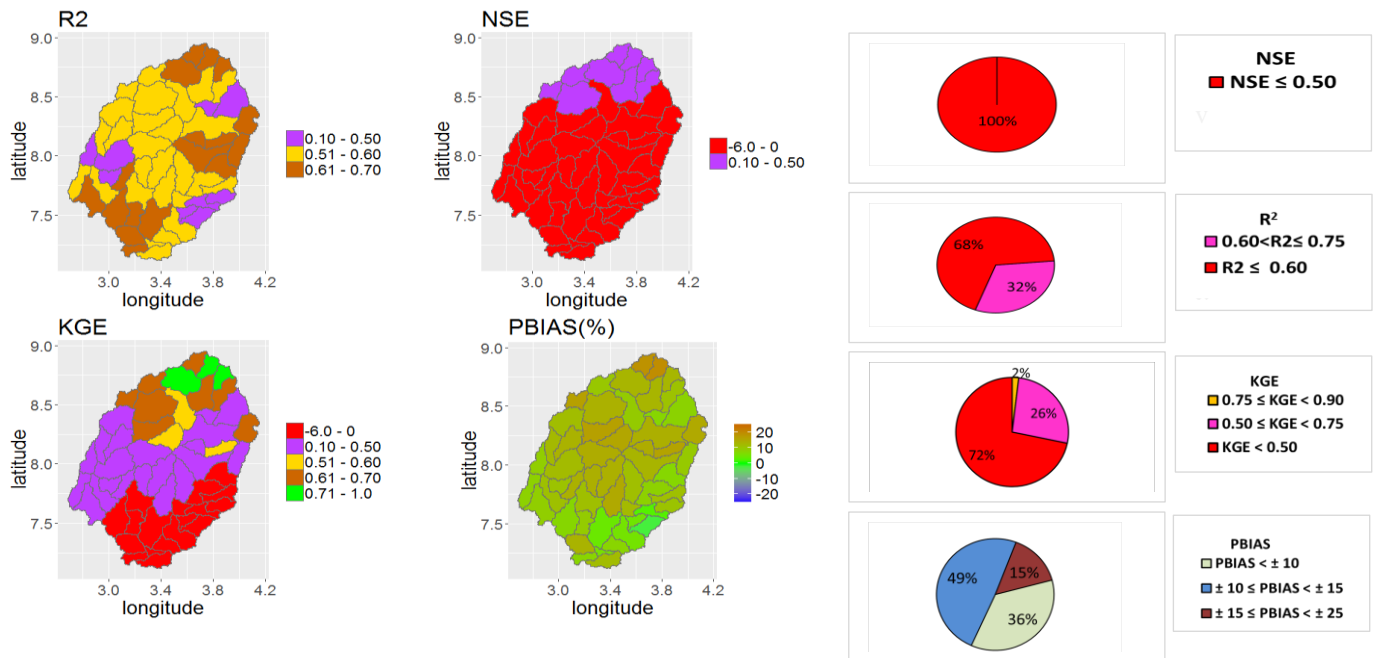

Figure S8: Performance metrics (NSE, KGE,  $R^2$ , and PBIAS) of SWAT (SWAT\_P-T) when validated with MOD16 (MS5).

5

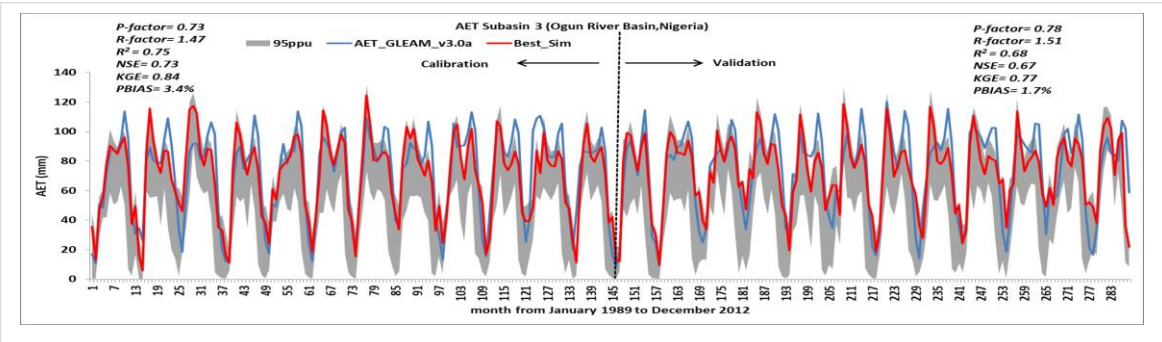

10

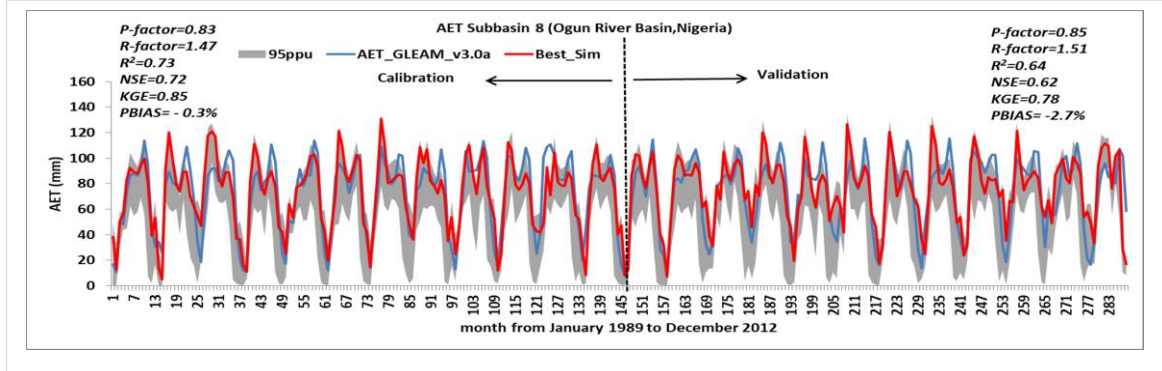

15

20

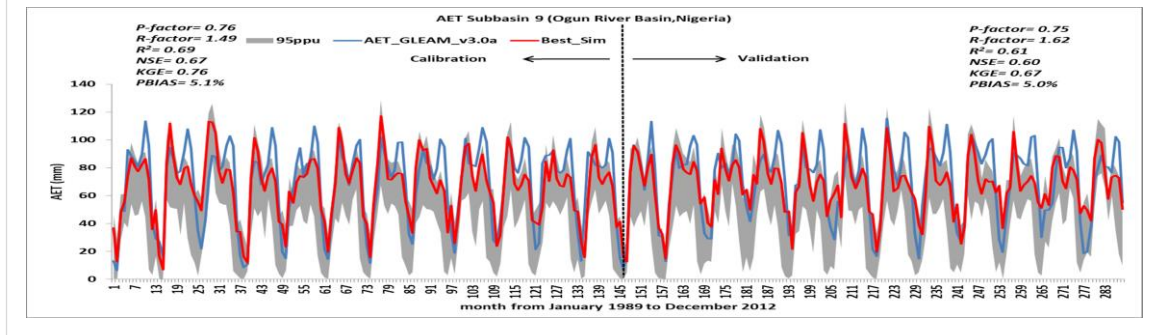

25

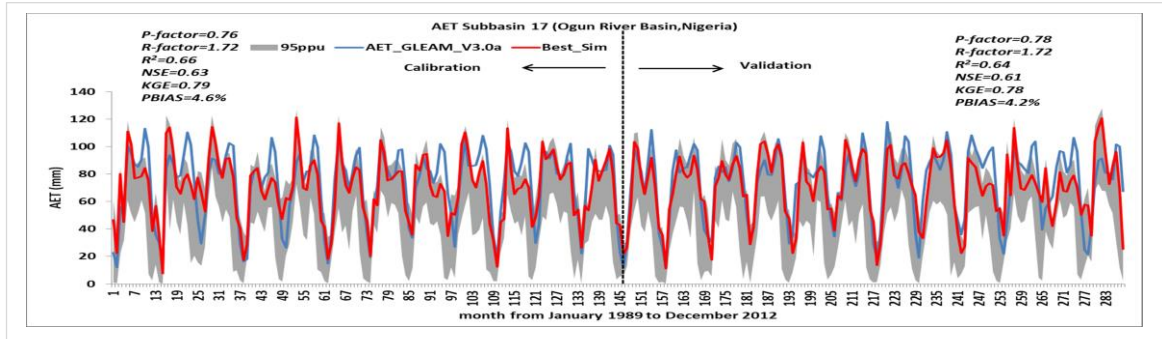

30

**Figure S9:** Extracts of the monthly calibration and validation results (GSI) for the selected upstream subbasins (with subbasin 17 where the Ikere gorge dam is located) showing the 95% prediction uncertainty interval along with the best SWAT simulated actual evapotranspiration and the satellite based actual evapotranspiration (GLEAM-v3.0a).



5

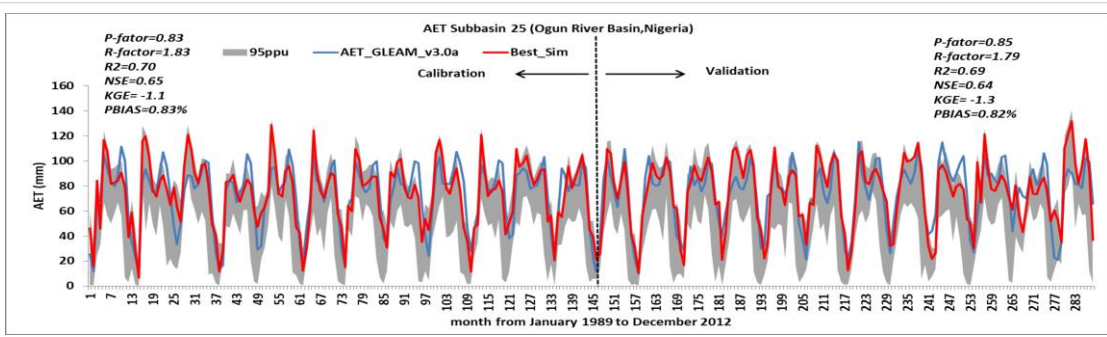

10

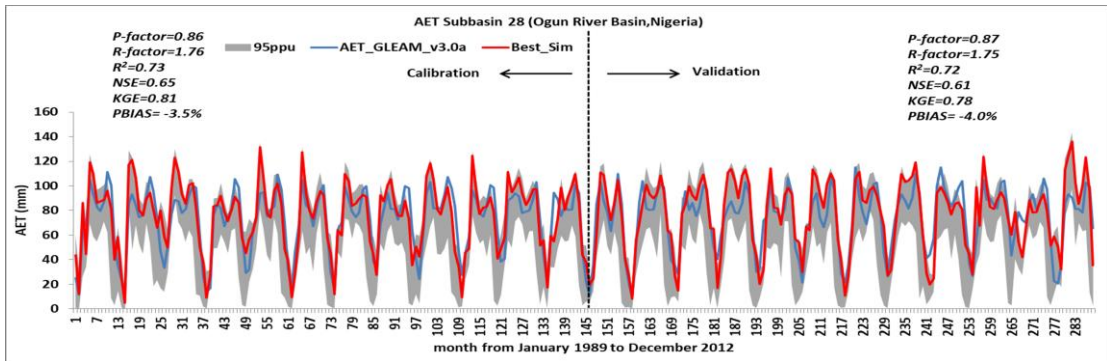

15

20

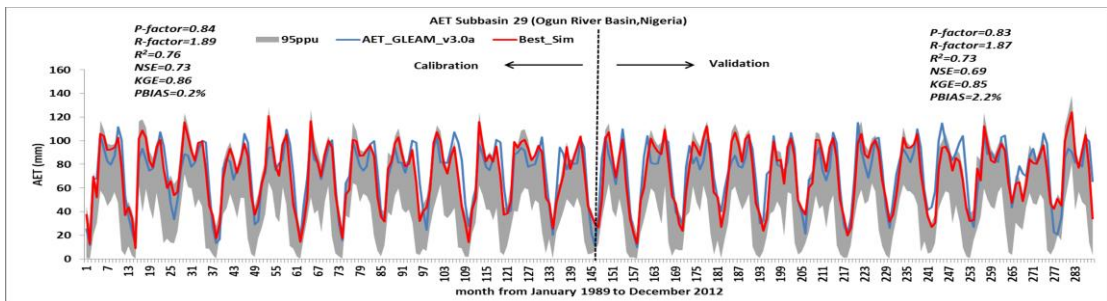

25

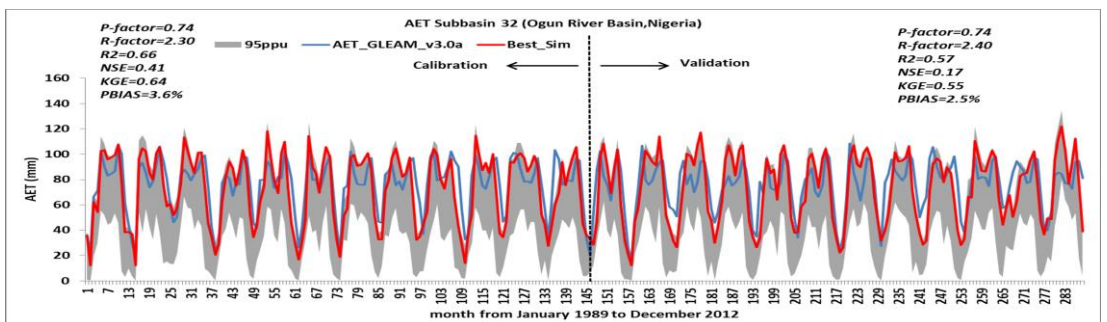

30

**Figure S10:** Extracts of the monthly calibration and validation results (GSI) for the selected subbasins (located at the middle of the watershed) showing the 95% prediction uncertainty interval along with the best SWAT simulated actual evapotranspiration and the satellite based actual evapotranspiration (GLEAM-v3.0a)

35

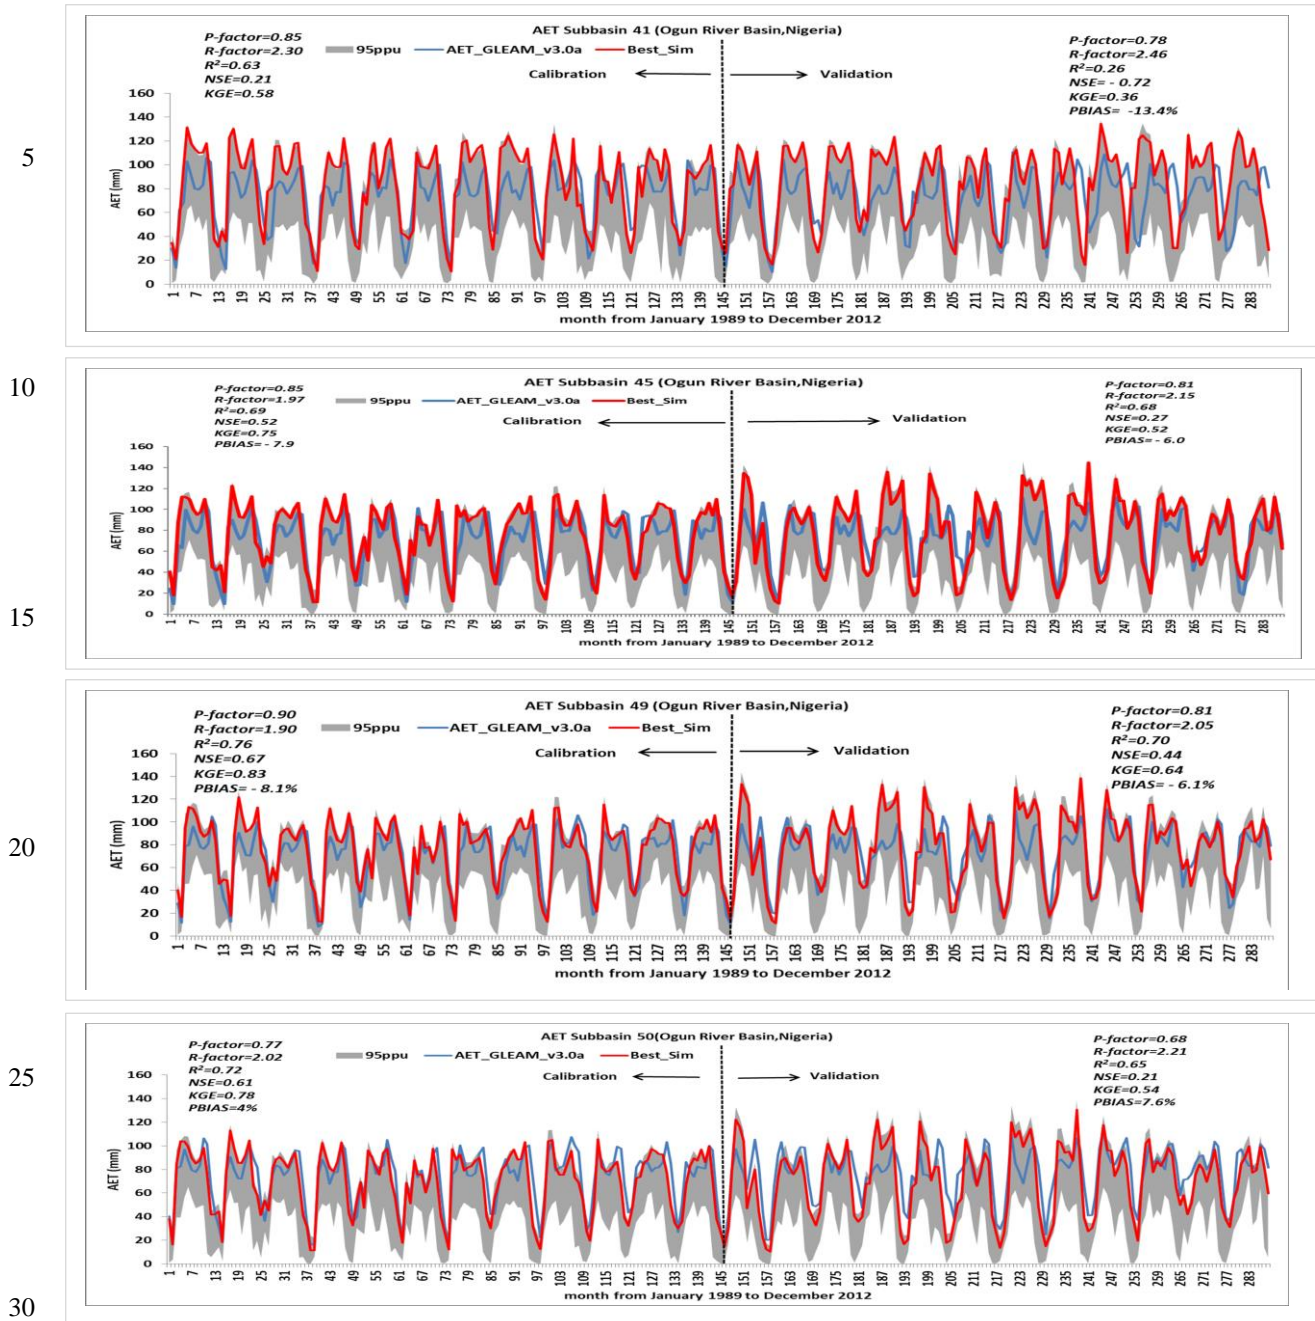

Figure S11: Extracts of the monthly calibration and validation results (GSI) for the selected downstream subbasins (including subbasin 50 where the Oyan dam is located) showing the 95% prediction uncertainty interval along with the best SWAT simulated actual evapotranspiration and the satellite based actual evapotranspiration (GLEAM-v3.0a).
